# Supplementary material for: How is the CH/π interaction important for molecular recognition?
Source: Royal Society of Chemistry journal article supplement (doi:10.1039/b316280j), 2004-01-01
Supplement: b316280j.doc [file b316280j.doc]

**How Is CH/ Interaction Important for Molecular Recognition?**

**Suyong Re* and Shigeru Nagase.** Coordinate data

Coordinate data (cartesian coordinate) of the optimized MP2/6-31G(d) geometries for **1 + 2** and **1 + 3** complexes.

Resorcinol cyclic tetramer (**1**)

Total energy (Hartree) : -1678.1353078

60

C -1.694650 3.150884 1.315662

C -3.150884 -1.694650 1.315662

C 1.694650 -3.150884 1.315662

C 3.150884 1.694650 1.315662

C .753154 2.484432 1.222509

C -2.484432 .753154 1.222509

C -.753154 -2.484432 1.222509

C 2.484432 -.753154 1.222509

C -2.521420 2.047826 .689050

C -2.047826 -2.521420 .689050

C 2.521420 -2.047826 .689050

C 2.047826 2.521420 .689050

C -.306851 3.248495 .725911

C -3.248495 -.306851 .725911

C .306851 -3.248495 .725911

C 3.248495 .306851 .725911

C -3.352774 2.274672 -.424676

C -2.274672 -3.352774 -.424676

C 3.352774 -2.274672 -.424676

C 2.274672 3.352774 -.424676

C -.025484 4.089868 -.357792

C -4.089868 -.025484 -.357792

C .025484 -4.089868 -.357792

C 4.089868 .025484 -.357792

C 1.242126 4.153620 -.925838

C -4.153620 1.242126 -.925838

C -1.242126 -4.153620 -.925838

C 4.153620 -1.242126 -.925838

O -3.490403 3.490403 -1.035949

O -3.490403 -3.490403 -1.035949

O 3.490403 -3.490403 -1.035949

O 3.490403 3.490403 -1.035949

O -1.068926 4.884322 -.826373

O -4.884322 -1.068926 -.826373

O 1.068926 -4.884322 -.826373

O 4.884322 1.068926 -.826373

H -1.604300 2.945067 2.388858

H -2.945067 -1.604300 2.388858

H 1.604300 -2.945067 2.388858

H 2.945067 1.604300 2.388858

H -2.214722 4.112107 1.228132

H -4.112107 -2.214722 1.228132

H 2.214722 -4.112107 1.228132

H 4.112107 2.214722 1.228132

H .568264 1.846781 2.088231

H -1.846781 .568264 2.088231

H -.568264 -1.846781 2.088231

H 1.846781 -.568264 2.088231

H 1.457900 4.800695 -1.774600

H -4.800695 1.457900 -1.774600

H -1.457900 -4.800695 -1.774600

H 4.800695 -1.457900 -1.774600

H -2.683693 4.030420 -.884618

H -4.030420 -2.683693 -.884618

H 2.683693 -4.030420 -.884618

H 4.030420 2.683693 -.884618

H -.762023 5.366659 -1.616379

H -5.366659 -.762023 -1.616379

H .762023 -5.366659 -1.616379

H 5.366659 .762023 -1.616379

3-oxo-1-butanol (**2**)

Total energy (Hartree) : -306.7016196

14

C -2.322409 -.733494 .000717

C -1.087265 .139786 -.000421

C .251787 -.567144 -.001208

C 1.423062 .393701 .000890

O 2.604129 -.411791 .000003

O -1.163169 1.368269 -.000438

H -3.212318 -.102900 -.002713

H -2.329222 -1.379057 .885121

H -2.326780 -1.385872 -.878649

H .315676 -1.224869 -.877534

H .315195 -1.228310 .872543

H 1.375421 1.039627 .886654

H 1.376097 1.042631 -.882688

H 3.367198 .189832 .000883

1-butanol (**3**)

Total energy (Hartree) : -232.8396975

15

C 2.522654 .051191 .000000

C 1.165802 -.649242 .000000

C .000000 .337234 .000000

C -1.351314 -.350778 .000000

O -2.352235 .669265 .000000

H 3.344626 -.670822 .000000

H 2.631768 .686749 .884195

H 2.631768 .686749 -.884195

H 1.090908 -1.302511 .878643

H 1.090908 -1.302511 -.878643

H .056229 .987996 -.880413

H .056229 .987996 .880413

H -1.443842 -.994729 .887819

H -1.443842 -.994729 -.887819

H -3.219721 .231266 .000000

**a (1 + 2)**

Total energy (Hartree) : -1984.8746871

74

C .829447 3.602197 -1.627743

C 3.941620 -.381847 -1.407042

C -.038313 -3.478487 -1.865240

C -3.136592 .506173 -2.178782

C -1.211424 2.104461 -1.814891

C 2.422031 1.652223 -1.417213

C 1.994916 -1.987571 -1.549139

C -1.656546 -1.539411 -1.948099

C 1.925565 2.855496 -.897434

C 3.152466 -1.563036 -.882908

C -1.270634 -2.753435 -1.364432

C -2.484398 1.655768 -1.437595

C -.554448 3.173830 -1.198799

C 3.466015 .931849 -.829644

C 1.220691 -3.075781 -1.132174

C -2.805334 -.835792 -1.568337

C 2.495591 3.340007 .296178

C 3.534632 -2.262866 .278298

C -2.079327 -3.271907 -.331247

C -3.105403 2.306972 -.356230

C -1.235531 3.822809 -.159923

C 4.030176 1.473444 .333409

C 1.661135 -3.764447 .006523

C -3.595546 -1.396001 -.554321

C -2.494798 3.405550 .259768

C 3.563354 2.658385 .891402

C 2.801245 -3.376786 .701345

C -3.252297 -2.607251 .042140

O 2.118826 4.506354 .901679

O 4.642090 -1.962703 1.020618

O -1.832229 -4.455624 .304226

O -4.333023 1.949814 .141774

O -.609251 4.924231 .411564

O 5.102126 .785381 .892218

O .924351 -4.878427 .393505

O -4.745725 -.727611 -.150862

H .937296 3.408410 -2.701429

H .952251 4.683667 -1.495656

H 3.828341 -.346774 -2.497094

H 5.011586 -.519717 -1.211623

H .088410 -3.246391 -2.929357

H -.184711 -4.563321 -1.801694

H -2.776812 .521499 -3.214555

H -4.222860 .645993 -2.231344

H -.717600 1.609284 -2.652096

H 1.990540 1.271748 -2.344338

H 1.693555 -1.456905 -2.453767

H -1.043485 -1.136098 -2.756030

H -3.025521 3.910877 1.065869

H 3.997041 3.073950 1.799597

H 3.135848 -3.904836 1.592757

H -3.878369 -3.043849 .817010

H 1.196301 4.728986 .650010

H 4.883970 -1.018993 .894975

H -.876577 -4.674154 .244210

H -4.578810 1.052597 -.201122

H -1.160514 5.257987 1.143680

H 5.355886 1.222868 1.726299

H 1.274114 -5.205724 1.243338

H -4.726871 -.735823 .842826

C .871152 -.153940 1.485833

C -.279186 -.316761 2.446427

C -1.647198 .079530 1.928446

C -2.763965 -.273114 2.898388

O -4.071634 .012874 2.359253

O -.133554 -.770005 3.582854

H 1.812311 -.358589 1.999393

H .886521 .852169 1.052439

H .752162 -.859597 .655434

H -1.809138 -.412178 .962248

H -1.636672 1.158274 1.715429

H -2.631432 .254506 3.849038

H -2.759543 -1.343068 3.112037

H -4.057617 .917364 1.987096

**b (1 + 3)**

Total energy (Hartree) : -1911.0108411

75

C -1.999858 -3.140855 -1.554769

C -3.603494 1.650324 -1.314640

C 1.167521 3.280488 -1.776101

C 2.762087 -1.507762 -2.105584

C .418854 -2.392336 -1.747465

C -2.849615 -.773314 -1.332761

C -1.238357 2.530264 -1.455123

C 2.052783 .915773 -1.874166

C -2.823372 -2.086189 -.845419

C -2.454843 2.466488 -.762242

C 2.123300 2.198822 -1.315973

C 1.758661 -2.344817 -1.338526

C -.559275 -3.154983 -1.102264

C -3.628031 .240990 -.767662

C -.137404 3.271745 -1.014801

C 2.926200 -.121197 -1.526076

C -3.596783 -2.379378 .294500

C -2.552282 3.164986 .456323

C 3.117214 2.439406 -.345089

C 2.113972 -3.087772 -.197958

C -.145763 -3.913990 .000229

C -4.414495 -.106928 .338337

C -.296121 3.985559 .180430

C 3.914141 .164766 -.573077

C 1.170714 -3.894023 .448281

C -4.409316 -1.393770 .865622

C -1.481959 3.946948 .905044

C 4.027228 1.433101 -.008176

O -3.667017 -3.623036 .862242

O -3.670377 3.186115 1.241670

O 3.306285 3.653197 .258971

O 3.378749 -3.106305 .331964

O -1.103577 -4.719682 .606639

O -5.223454 .892030 .873658

O .774406 4.772161 .593522

O 4.793345 -.842545 -.190027

H -2.024768 -2.932605 -2.630975

H -2.454274 -4.129482 -1.420382

H -3.497883 1.602324 -2.404974

H -4.559708 2.150215 -1.119166

H .951001 3.120568 -2.839084

H 1.646850 4.263952 -1.702914

H 2.409969 -1.418925 -3.140339

H 3.732689 -2.015864 -2.155962

H .129817 -1.825696 -2.633721

H -2.250926 -.534808 -2.213285

H -1.155615 1.999267 -2.404764

H 1.289538 .720792 -2.629702

H 1.492644 -4.486507 1.303866

H -5.011685 -1.660654 1.732564

H -1.601333 4.496271 1.837754

H 4.809491 1.652568 .714903

H -2.820761 -4.094707 .702329

H -4.260992 2.432588 1.021053

H 2.450817 4.133838 .290683

H 3.927453 -2.392064 -.082922

H -.704035 -5.154502 1.382599

H -5.662052 .543159 1.671959

H .558714 5.165450 1.459364

H 4.841652 -.787358 .802258

C -.687227 .227767 1.592998

C .561477 .449651 2.443728

C 1.694886 -.489635 2.036617

C 2.960800 -.293847 2.854831

O 4.055990 -1.119019 2.398224

H -1.503099 .888719 1.900807

H -1.038820 -.807219 1.669205

H -.472831 .431090 .539418

H .324594 .308248 3.506940

H .897958 1.488961 2.330443

H 1.924032 -.333961 .977878

H 1.356300 -1.530244 2.137778

H 2.770873 -.505131 3.916178

H 3.316620 .736741 2.774235

H 3.683139 -1.986041 2.136665

**a’(1 + 2)**

Total energy (Hartree) : -1984.8805165

74

C 2.416381 2.956411 -1.383630

C 3.542847 -1.978173 -1.417159

C -1.394118 -3.011024 -1.865444

C -2.474861 1.923212 -2.160475

C -.062061 2.505662 -1.682789

C 3.026615 .504590 -1.297828

C 1.097743 -2.607916 -1.574039

C -2.024418 -.564116 -1.958371

C 3.163279 1.792889 -.764612

C 2.293709 -2.607438 -.841066

C -2.284907 -1.851748 -1.472841

C -1.408071 2.559281 -1.296084

C .980409 3.054156 -.930846

C 3.762878 -.594308 -.844240

C -.117974 -3.075832 -1.060345

C -2.838597 .539161 -1.672811

C 4.048251 1.966446 .316790

C 2.261632 -3.119645 .470667

C -3.413280 -2.029199 -.644798

C -1.709452 3.191734 -.076114

C .629378 3.698353 .263411

C 4.675810 -.362317 .193899

C -.109047 -3.543626 .260901

C -3.955409 .320398 -.853389

C -.693621 3.774375 .691334

C 4.821621 .894319 .773490

C 1.067723 -3.619793 .998031

C -4.262849 -.951946 -.375698

O 4.257839 3.174948 .928655

O 3.345593 -3.183148 1.300964

O -3.771274 -3.243933 -.128586

O -2.981002 3.295866 .429110

O 1.660740 4.283246 .986589

O 5.436503 -1.449459 .612807

O -1.305014 -3.966001 .836925

O -4.751278 1.407285 -.501673

H 2.425430 2.831363 -2.472943

H 2.947773 3.892873 -1.177484

H 3.427340 -1.903655 -2.504882

H 4.424480 -2.606370 -1.242893

H -1.128658 -2.904428 -2.924378

H -1.952195 -3.950776 -1.781691

H -2.089728 1.852606 -3.184653

H -3.369466 2.555078 -2.212856

H .181713 2.035043 -2.636149

H 2.327554 .353048 -2.122249

H 1.121903 -2.243579 -2.602494

H -1.153955 -.417808 -2.601022

H -.967304 4.289339 1.611648

H 5.513254 1.069189 1.596054

H 1.061032 -4.004072 2.014976

H -5.141986 -1.118830 .242612

H 3.421284 3.685954 .893093

H 4.114044 -2.704577 .923158

H -2.938755 -3.721407 .097271

H -3.609803 2.753986 -.111744

H 1.293708 4.694377 1.790881

H 5.970888 -1.176885 1.382141

H -1.367355 -3.497239 1.698743

H -4.965595 1.266185 .455940

C .414463 -.360411 1.448375

C -.954347 -.621572 2.024155

C -1.951825 .501767 1.893532

C -3.283898 .258723 2.580255

O -4.259067 1.250418 2.191721

O -1.274382 -1.707163 2.522354

H 1.163792 -.968147 1.957703

H .676022 .700402 1.499319

H .405820 -.649755 .390255

H -2.105885 .643268 .815932

H -1.490084 1.432904 2.247478

H -3.166112 .265356 3.670662

H -3.693575 -.708850 2.291324

H -3.788840 2.104470 2.111747
